# Supplementary material for: Room-temperature synthesis and CO2-gas sensitivity of bismuth oxide nanosensors
Source: Royal Society of Chemistry journal article supplement (doi:10.1039/d0ra00801j), 2020-01-01
Supplement: d0ra00801j1.pdf [file d0ra00801j1.pdf]

## Supporting Information

### Room-temperature Synthesis and CO<sub>2</sub>-Gas Sensitivity of Bismuth Oxide Nanosensors

Pritamkumar V. Shinde<sup>a</sup>, Nanasaheb M. Shinde<sup>b</sup>, Shoyebmohamad F. Shaikh<sup>d</sup>, Je Moon Yun<sup>b</sup>, Lee Jung Woo<sup>c</sup>, Abdullah M. Al-Enizi<sup>d\*</sup>, Rajaram S. Mane<sup>ae\*</sup>, and Kwang Ho Kim<sup>ab\*</sup>

<sup>a</sup>Global Frontier R&D Center for Hybrid Interface Materials, <sup>b</sup>National Core Research Center, and <sup>c</sup>School of Materials Science and Engineering Pusan National University, 30, Jangjeon-dong, Geumjung-gu, Busan 609-735, Republic of Korea.

<sup>d</sup> College of Science, Department of Chemistry, King Saud University, Riyadh 11451, Saudi Arabia

<sup>e</sup>School of Physical Sciences, Swami Ramanand Teerth Marathwada University, Nanded, Nanded, Maharashtra, India.

**Corresponding Author.** mane3796@pusan.ac.kr (Rajaram Mane, Prof.),

amenizi@ksu.edu.sa (A. M. Al-Enizi, Prof.), and kwhokim@pusan.ac.kr (K. H. Kim, Prof.)

***Characterizations***

The physical elucidation and morphological analysis of  $\text{Bi}_3\text{O}_2$  nanostructures were performed by using X-ray diffraction patterns (Bruker D8 discover XRD diffractometer using  $\text{Cu K}\alpha$  radiation ( $\lambda = 1.5406 \text{ \AA}$ ) at 40 kV and 40 mA), field-emission scanning electron microscopy (FE-SEM, Hitachi, S-4800, 15 kV) images equipped with energy-dispersive X-ray spectroscopy (EDX), and high-resolution transmission electron microscopy (HRTEM, JEOL 2100F) with the selected area electron diffraction (SAED) (Technai F20) techniques, respectively. The X-ray photoelectron spectroscopy (XPS, VG Scientifics ESCALAB250) measurement was performed to analyze the chemical bonding information of Bi-O. The Brunauer–Emmett–Teller (BET) and Barrett–Joyner–Halenda (BJH) measurement plots obtained using the Micrometrics ASAP2010 analyzer were used to obtain the surface area and pore-size distributions of the powder scratched from the respective  $\text{Bi}_2\text{O}_3$ -film-sensor surfaces.

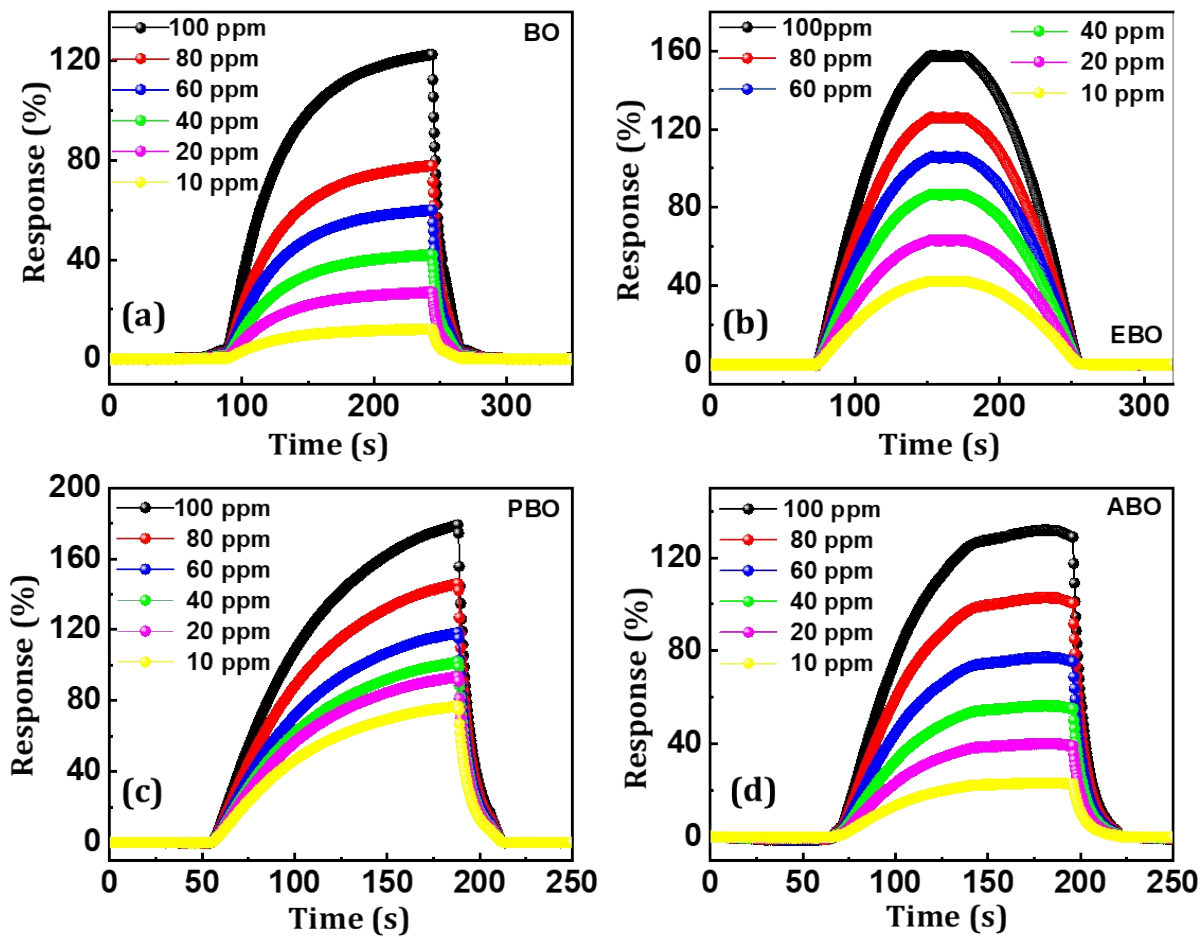

**Figure S1.** The response vs. time (at different 10-100 ppm) of the (a) BO, (b) PBO, (c) EBO, and (d) ABO film sensors

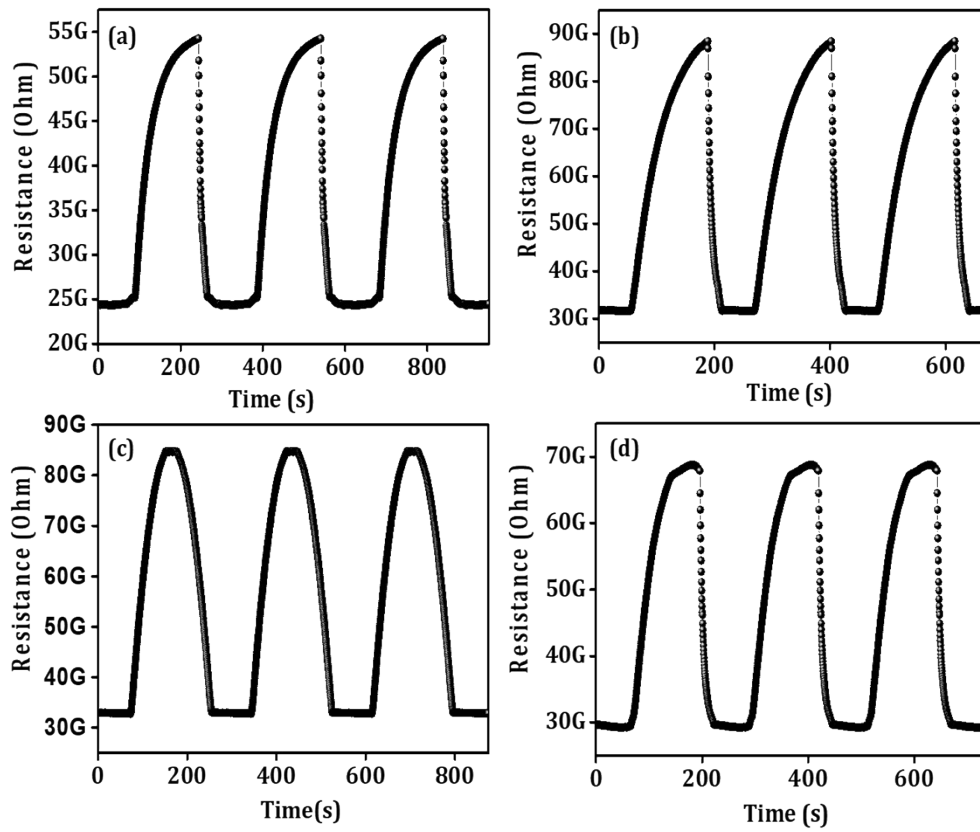

**Figure S2.** The repeatability of transient vs. time (at 100 ppm) of the BO, PBO, EBO and ABO film sensors

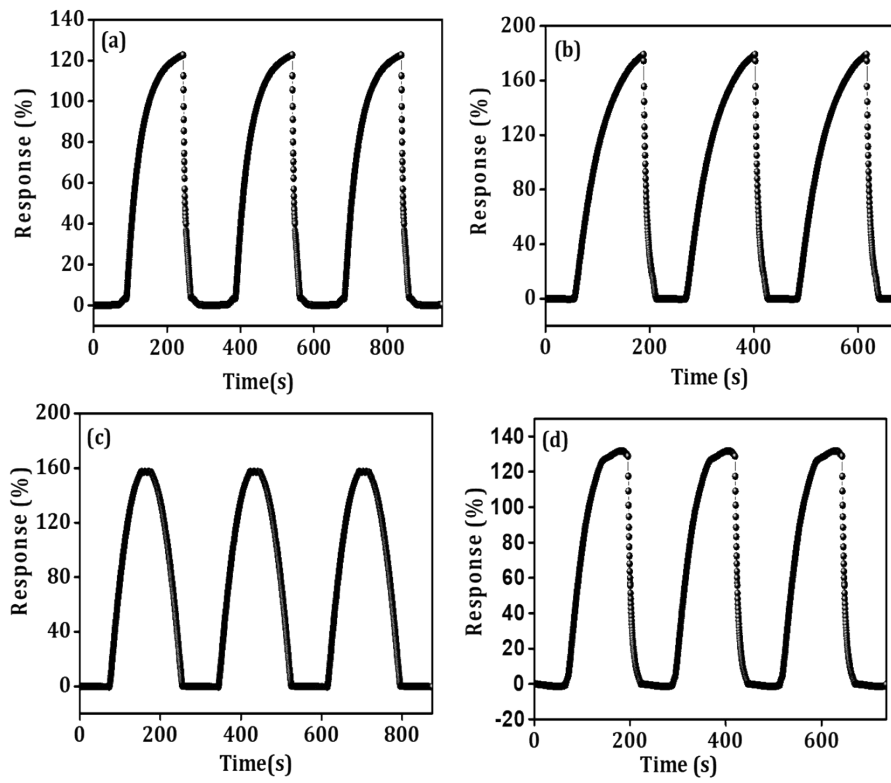

**Figure S3.** The repeatability of response vs. time (at 100 ppm) of the (a) BO, (b) PBO, (c) EBO, and (d) ABO film sensors

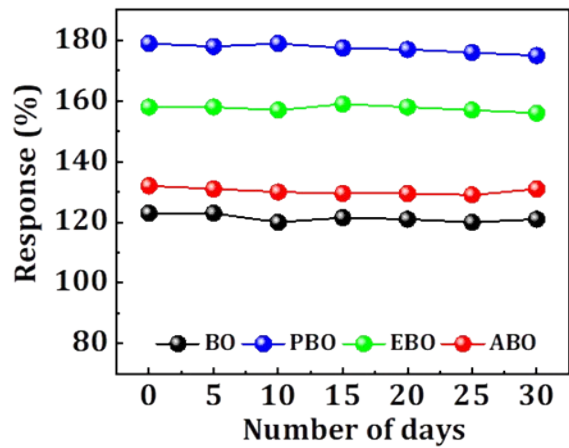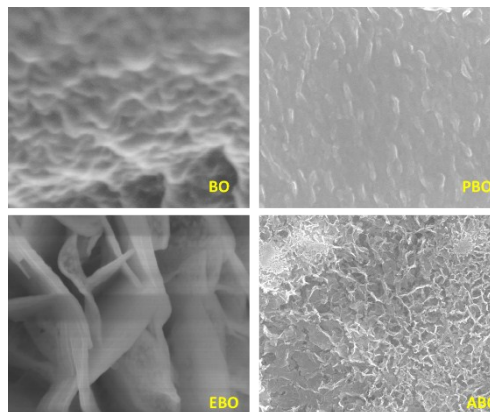

(a)

(b)

**Figure. S4** (a) Stability measurements of the BO, PBO, EBO, and ABO film sensors (b) after sensing experiments morphological stability of the BO, PBO, EBO, and ABO film sensors

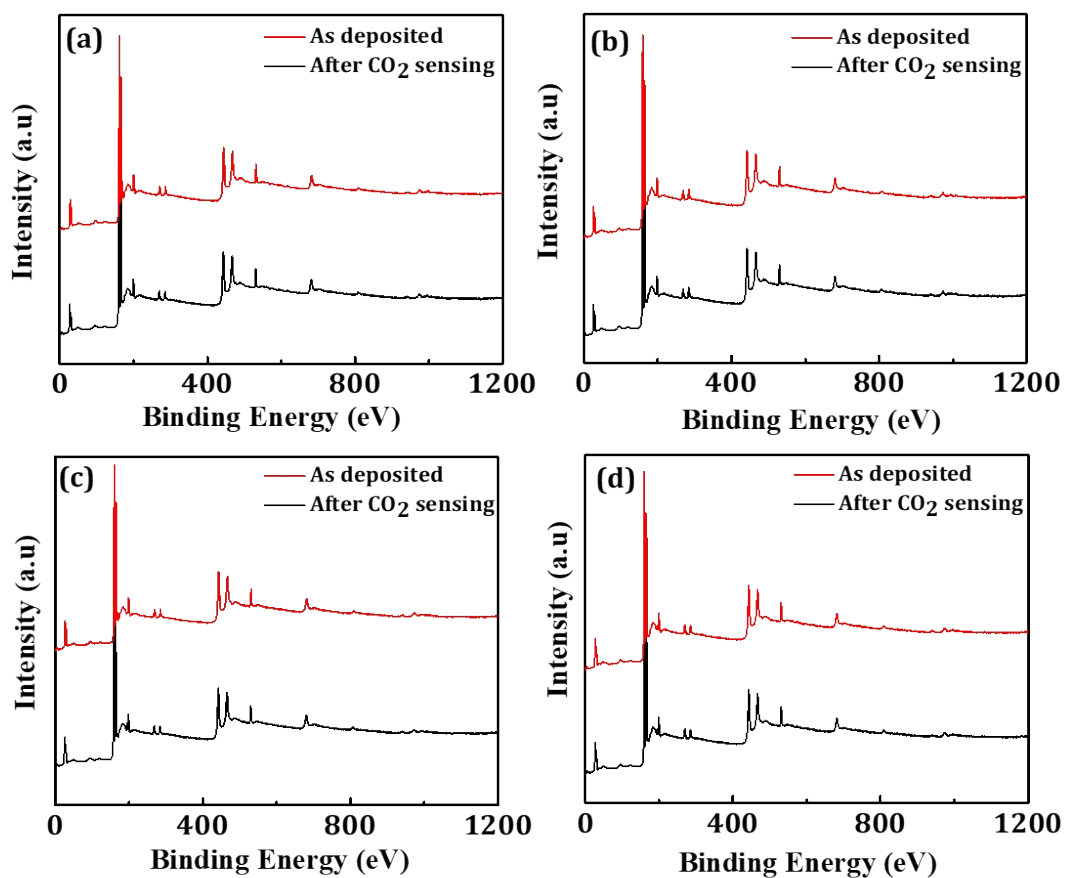

**Figure. S5.** Survey XPS before and after gas sensing of (a) BO, (b) PBO, (c) EBO, and (d) ABO film sensors

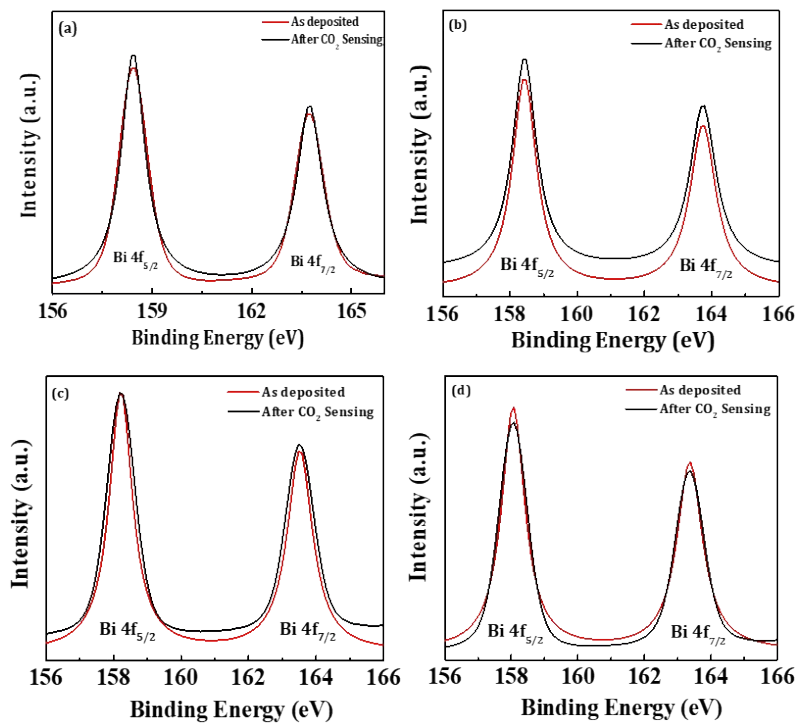

**Figure. S6.** Enlarged XPS spectra of Bi4f before and after gas sensing of (a) BO, (b) PBO, (c) EBO, and (d) ABO film sensors



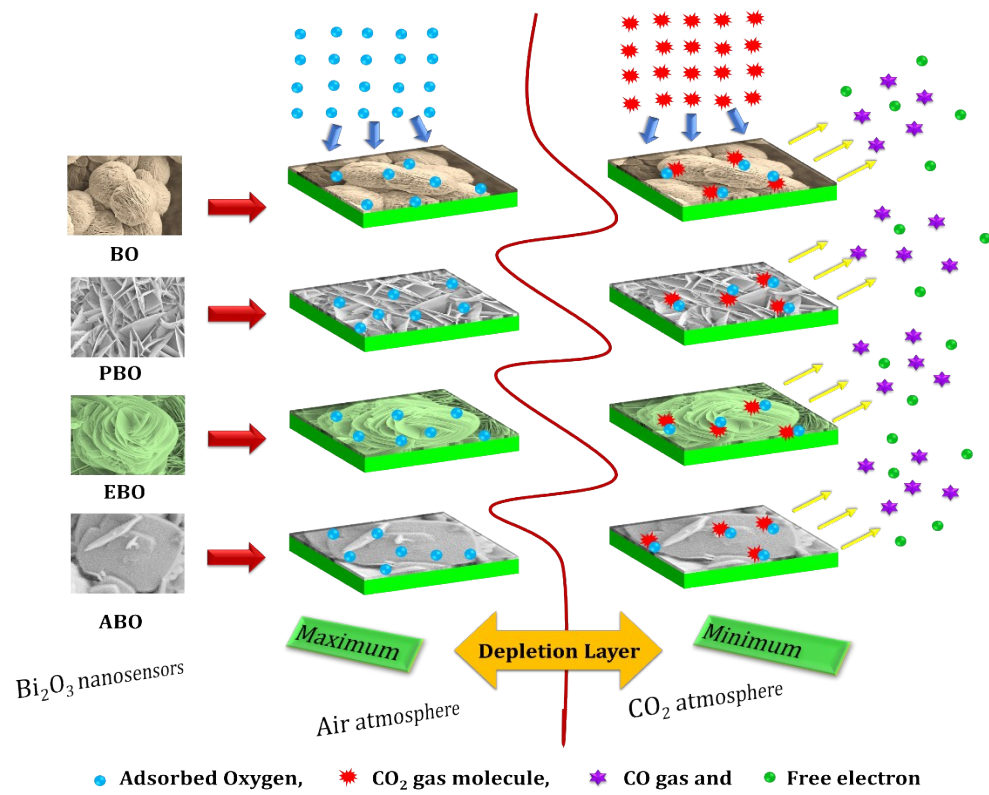

**Figure. S7.** The gas sensing mechanism of the BO, PBO, EBO and ABO nanosensors in air and in the presence of  $\text{CO}_2$  gas.

**Table S1** Compared present work with the previously reported data on CO<sub>2</sub> gas sensing.

| Sr. No. | Material                           | Structure              | Synthesis method           | C (ppm) | S (%) | t <sub>res</sub> /t <sub>rec</sub> (s) | Temp | Ref. |
|---------|------------------------------------|------------------------|----------------------------|---------|-------|----------------------------------------|------|------|
| 1       | graphene                           | Nanosheet              | Stamping method            | 100     | 26    | 8/10                                   | 60   | S1   |
| 2       | rGO-F20                            | Smooth nanosheet       | Hydrogen plasma method     | 1500    | 15    | ~240/240                               | 23   | S2   |
| 3       | La <sub>2</sub> O <sub>3</sub>     | Micro rod              | CBD                        | 350     | 48    | 50/73                                  | 250  | S3   |
| 4       | La <sub>2</sub> O <sub>3</sub>     | Honeycomb              | Spray pyrolysis            | 500     | 68    | 180/125                                | 300  | S4   |
| 5       | La <sub>2</sub> O <sub>3</sub>     | Web-like nanoparticles | Ultrasonic spray pyrolysis | 300     | 75    | 80/141                                 | 225  | S5   |
| 6       | La <sub>2</sub> O <sub>3</sub>     | Nanorod                | Microwave-Assisted         | 400     | 25    | 80/50                                  | 450  | S6   |
| 7       | Pd: La <sub>2</sub> O <sub>3</sub> | Disk on Nanorod        | Microwave-Assisted         | 400     | 64    | 80/50                                  | 250  | S6   |
| 8       | Bi <sub>2</sub> O <sub>3</sub>     | Nanoporous             | Anodization                | 100     | 77    | -                                      | 27   | S7   |
| 9       | β-Bi <sub>2</sub> O <sub>3</sub>   | Nanoplates             | CBD                        | 1000    | 100   | 40/50                                  | 150  | S8   |

|    |     |                         |     |     |     |        |    |                 |
|----|-----|-------------------------|-----|-----|-----|--------|----|-----------------|
| 10 | BO  | Woolen<br>globes        | CBD | 100 | 123 | 77/82  | 27 |                 |
| 11 | PBO | Nano sheets             | CBD | 100 | 179 | 132/82 | 27 |                 |
| 12 | ABO | Flower-rose             | CBD | 100 | 158 | 151/28 | 27 | Present<br>Work |
| 13 | EBO | Spongy<br>square plates | CBD | 100 | 132 | 89/32  | 27 |                 |

C = concentration;  $t_{res}/t_{rec}$  = response time/recovery time; and S % = Gas Response in %

## References

- S1 H. J. Yoon, J. H. Yang, Z. Zhou, S. S. Yang, and M. M.C. Cheng, Carbon dioxide gas sensor using a graphene sheet. *Sens. and Actuators B*, 157 (2011) 310–313.
- S2 S. M. Hafiz, R. Ritikos, T. J. Whitcher, N. M. Razib, D. C. S. Bien, N. Chanlek, H. Nakajima, T. Saisopa, P. Songsiriritthigul, N. M. Huang, S. A. Rahman, A practical carbon dioxide gas sensor using room-temperature hydrogen plasma reduced graphene oxide. *Sens. Actuators B*, 193 (2014) 692–700.
- S3 A. Yadav, A. C. Lokhande, J. H. Kim and C. D. Lokhande, Highly sensitive CO<sub>2</sub> sensor based on microrods-like La<sub>2</sub>O<sub>3</sub> thin film electrode. *RSC Adv.*, 6 (2016) 106074.
- S4 A. Yadav, A. C. Lokhande, R. B. Pujari, J. H. Kim, C. D. Lokhande, The synthesis of multifunctional porous honey comb-like La<sub>2</sub>O<sub>3</sub> thin film for supercapacitor and gas sensor applications. *J Colloid Infr Sci.*, 484 (2016) 51–59.

- S5 A. A. Yadav, V. C. Lokhande, R. N. Bulakhe and C.D. Lokhande, Amperometric CO<sub>2</sub> gas sensor based on interconnected web-like nanoparticles of La<sub>2</sub>O<sub>3</sub> synthesized by ultrasonic spray pyrolysis. *Microchim. Acta*, 184 (2017) 3713-3720.
- S6 A. A. Yadav, A. C. Lokhande, J. H. Kim, C. D. Lokhande, Enhanced sensitivity and selectivity of CO<sub>2</sub> gas sensor based on modified La<sub>2</sub>O<sub>3</sub> nanorods. *J. Alloy and Compd*, 723 (2017) 880–886.
- S7 M. Ahila, J. Dhanalakshmi, J. C. Selvakumari and D. P. Padiyan, Heat treatment effect on crystal structure and design of highly sensitive room temperature CO<sub>2</sub> gas sensors using anodic Bi<sub>2</sub>O<sub>3</sub> nanoporous formed in a citric acid electrolyte. *Mater. Res. Express*, 3 (2016) 105025.
- S8 S. S. Bhande, R. S. Mane, A. V. Ghule and S. H. Han, A bismuth oxide nanoplate-based carbon dioxide gas sensor. *Scr. Mater.* 65 (2011) 1081–1084.
